# Supplementary material
Source: publisher figshare collection journal article supplement (https://acs.figshare.com/ndownloader/files/17970332)
Supplement: Supplementary file 1 [file 17970332]

## SUPPORTING INFORMATION

### **Silver Nanoparticle-Based Surface-Enhanced Raman Spectroscopy for the Rapid and Selective Detection of Trace Tropane Alkaloids in Food**

Jianglong Lu,<sup>†,‡</sup> Zhuanyun Cai,<sup>§</sup> Yisong Zou,<sup>§</sup> Deyin Wu,<sup>§</sup> Aihua Wang,<sup>||</sup> Jing Chang,<sup>||</sup> Fangling Wang,<sup>||</sup> Zhongqun Tian,<sup>§</sup> and Guokun Liu<sup>\*,†,‡</sup>

<sup>†</sup>State Key Laboratory of Marine Environmental Science, College of the Environment and Ecology, Xiamen University, Xiamen 361005, and P. R. China

<sup>‡</sup>Fujian Provincial Key Laboratory for Coastal Ecology and Environmental Studies, Center for Marine Environmental Chemistry & Toxicology, Xiamen University, Xiamen 361102, China

<sup>§</sup>State Key Laboratory of Physical Chemistry of Solid Surfaces, College of Chemistry and Chemical Engineering, Xiamen University, Xiamen 361005, P. R. China

<sup>||</sup>Institute of Forensic Science, Ministry of Public Security, Beijing 100038, P. R. China

#### **Corresponding Author**

\*E-mail: guokunliu@xmu.edu.cn.

Figure S1(A) and (B) show the extinction spectra of Ag seeds and Ag NPs in the range of 300 nm to 800 nm respectively. One clearly observed that the extinctive peak was red shifted from 412.5 nm (A) to 477.5 nm (B), and the FHHM (full-width of half maximum) of Ag seeds was broadened of 15 nm due to the enlarged diameter of Ag NPs, accordingly. Inset SEM images displayed the size distributes and morphology of these two NPs: both displayed quasi-spherical shape, with the size increased from  $50\pm 5.3$  nm (seeds) to  $100\pm 8.8$  nm (Ag NPs) averaged from 100 nanoparticles.

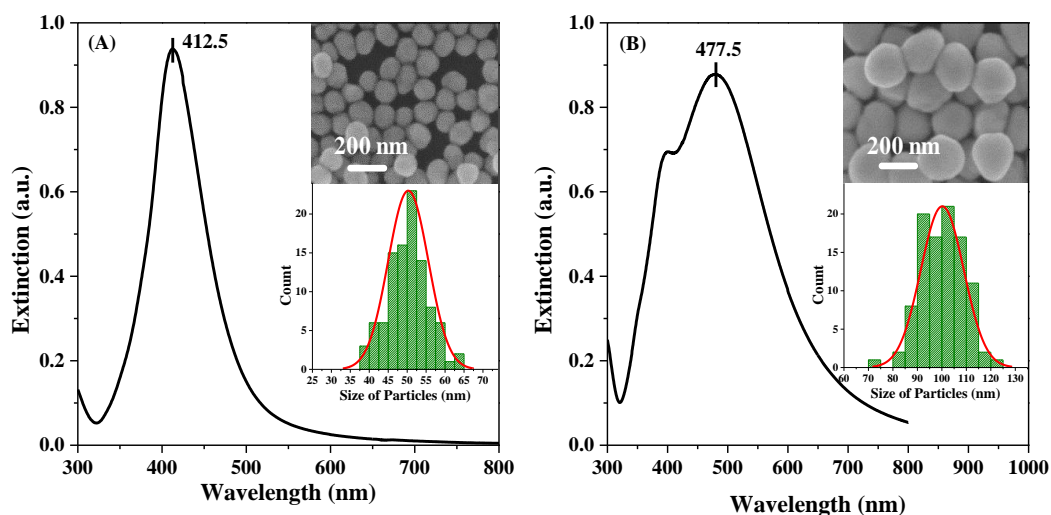

Figure S1. Extinction spectra of the Ag NPs. (A) Ag seeds, and (B) grown Ag NPs.

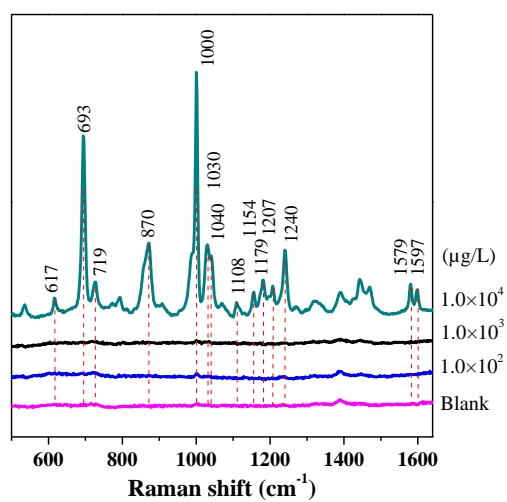

Figure S2. Concentration dependent SERS spectra of SB by using 1 M NaCl as aggregating agent.

Figure S3 (A)-(C) show the effects from concentrations of KI and Ag NPs and aggregation time for SERS signal by using  $1.0 \times 10^2 \mu\text{g/L}$  SB as target. The concentration of KI was varied from 0.1 M to 3 M, the results (A) show the SERS intensity increased with concentration increasing between 0.1-1.0 M. Then the signal decreased because of large aggregates produced by too fast aggregation. For Ag NPs (B), with the increasing of Ag NPs, the SERS intensity increased slowly and then decreased. At the low concentration of Ag NPs, increasing the number of nanoparticles can improve amount of absorbed molecules, which induced enhancement of SERS signal. After particles reached a high concentration, total molecules absorbed on each Ag NPs began to decrease, which weakened the signal. In addition, a large number of nanoparticles aggravated the absorption and scattering of incident light. Therefore, Ag NPs with concentration of  $1.5 \times 10^{-8} \text{ mol/L}$  were used. The result of aggregating time (C) indicated the SERS signal decreased slowly after mixing. Therefore, the sample should be detected immediately after mixture.

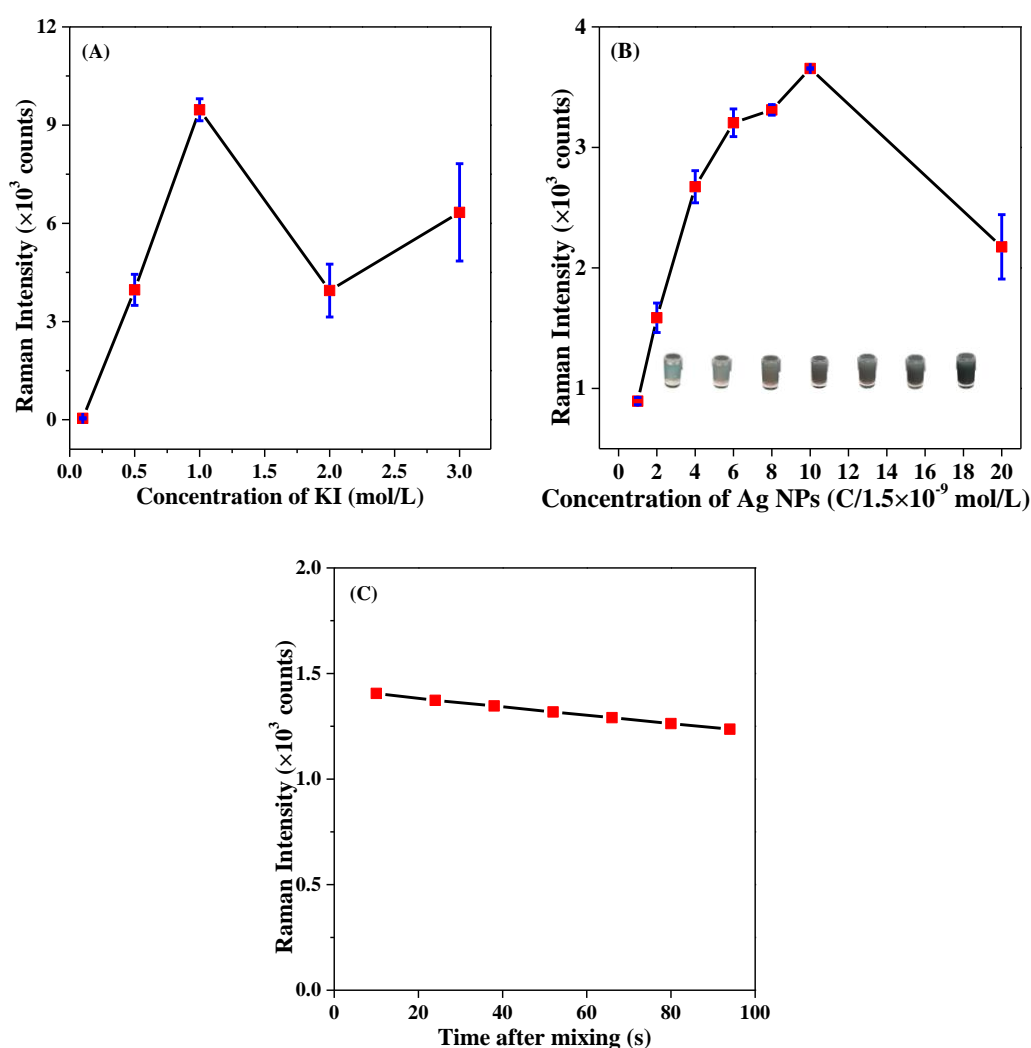

Figure S3. Optimization of detection conditions by using  $1.0 \times 10^2 \mu\text{g/L}$  SB. (A) SERS intensity of the  $693 \text{ cm}^{-1}$  peak with different concentrations of KI, (B) SERS intensity of the  $693 \text{ cm}^{-1}$  peak with different concentrations of Ag NPs, and (C) SERS intensity of the  $693 \text{ cm}^{-1}$  peak with different aggregating time.

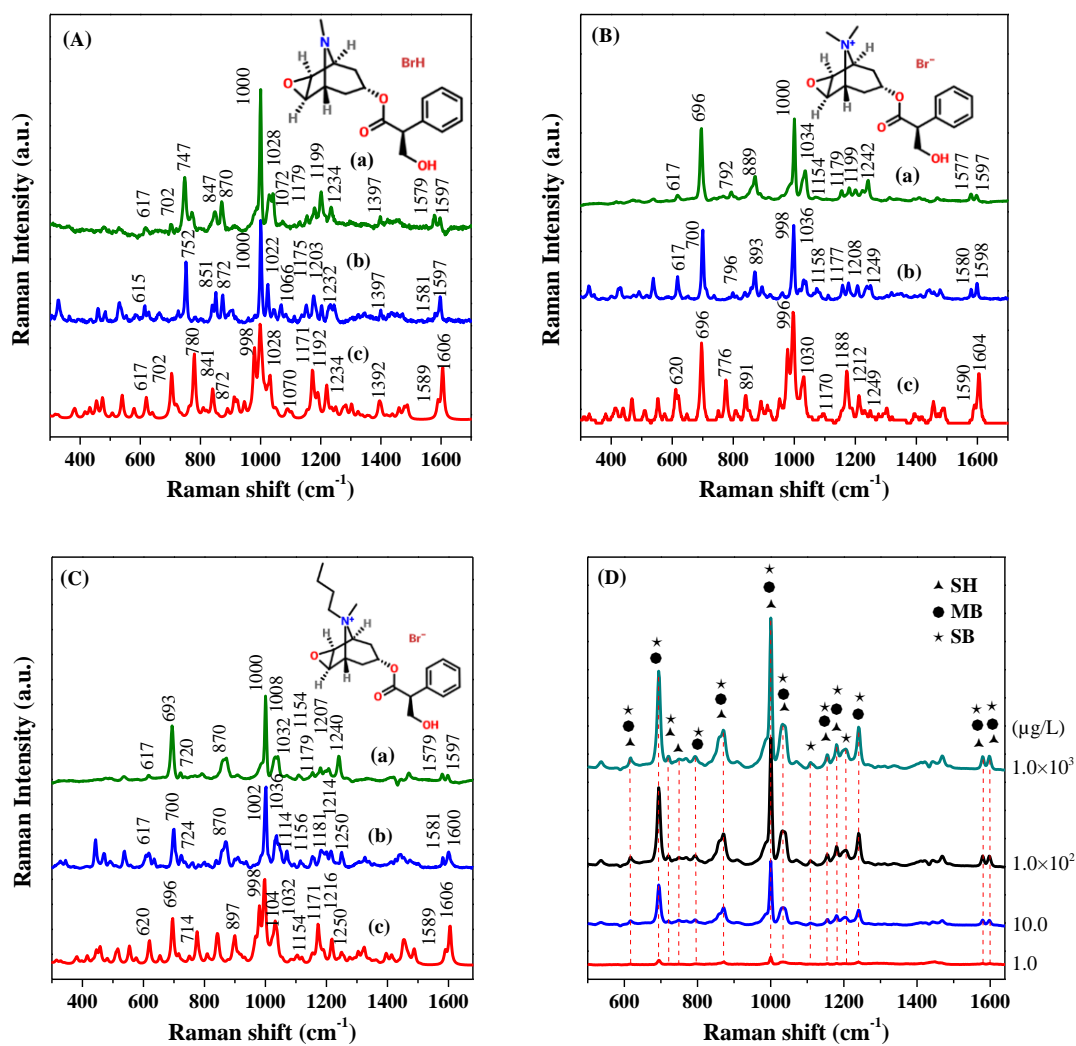

Figure S4. Raman spectra of TAs. (A) SH, (B) MB, (C) SB, and (D) Mixture. (a) SERS of spectra of aqueous solution, (b) solid normal Raman spectra, and (c) calculated Raman spectra.

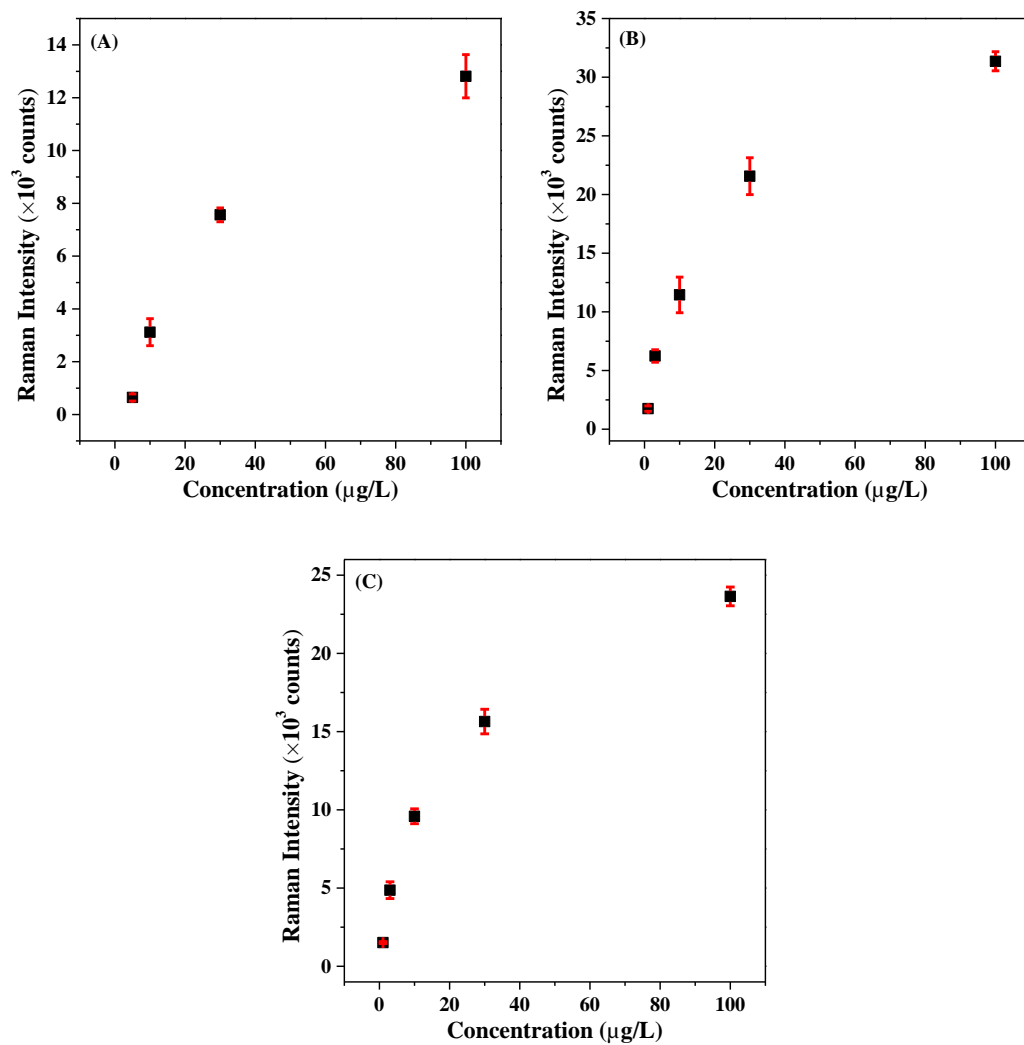

Figure S5. SERS intensity of the  $693\text{ cm}^{-1}$  peak with different concentrations. (A) SH, (B) MB, and (C) SB.

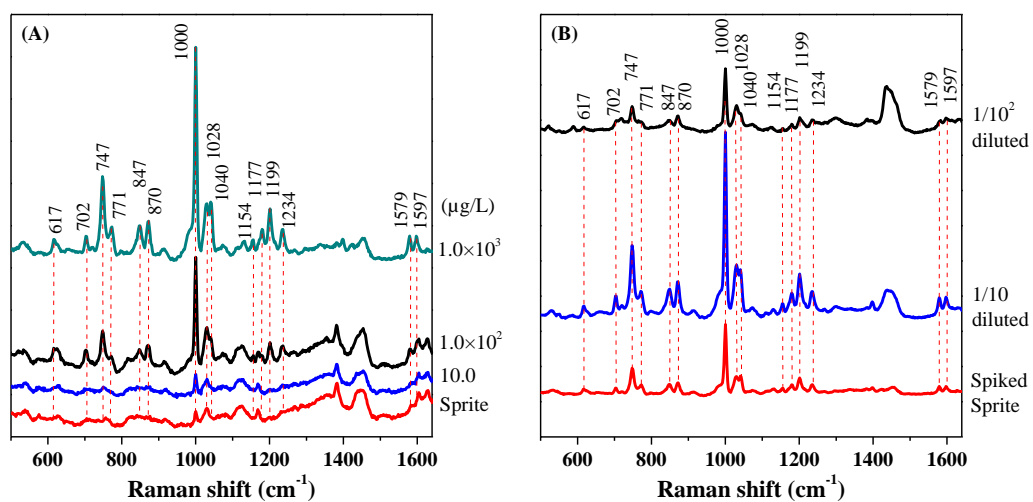

Figure S6. SERS spectra of SH. (A) Sprite spiked with different concentrations of SH, and (B) Sprite Spiked at  $1.0 \times 10^3 \mu\text{g/L}$  was diluted to different times by ultrapure water.

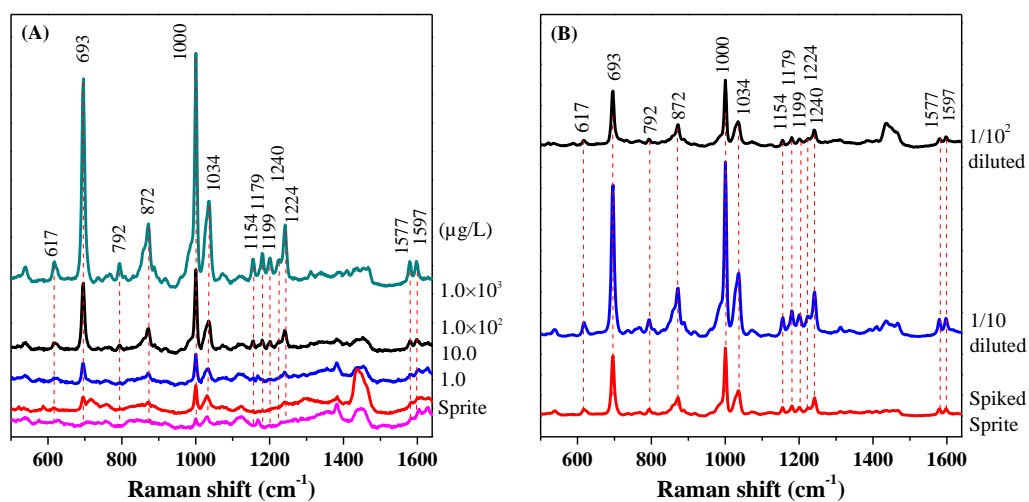

Figure S7. SERS spectra of MB. (A) Sprite spiked with different concentrations of MB, and (B) Sprite Spiked at  $1.0 \times 10^3 \mu\text{g/L}$  was diluted to different times by ultrapure water.



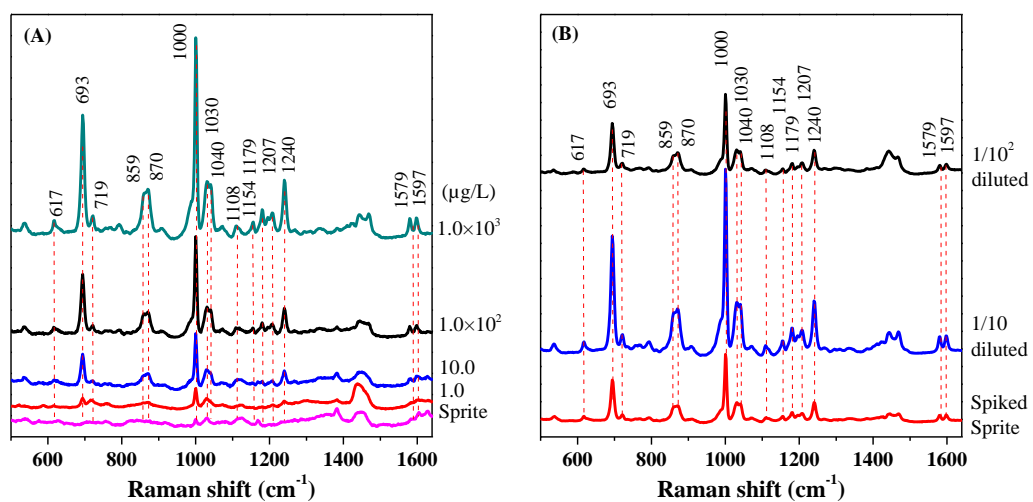

Figure S8. SERS spectra of SB. (A) Sprite spiked with different concentrations of SB, and (B) Sprite Spiked at  $1.0 \times 10^3$  µg/L was diluted to different times by ultrapure water.

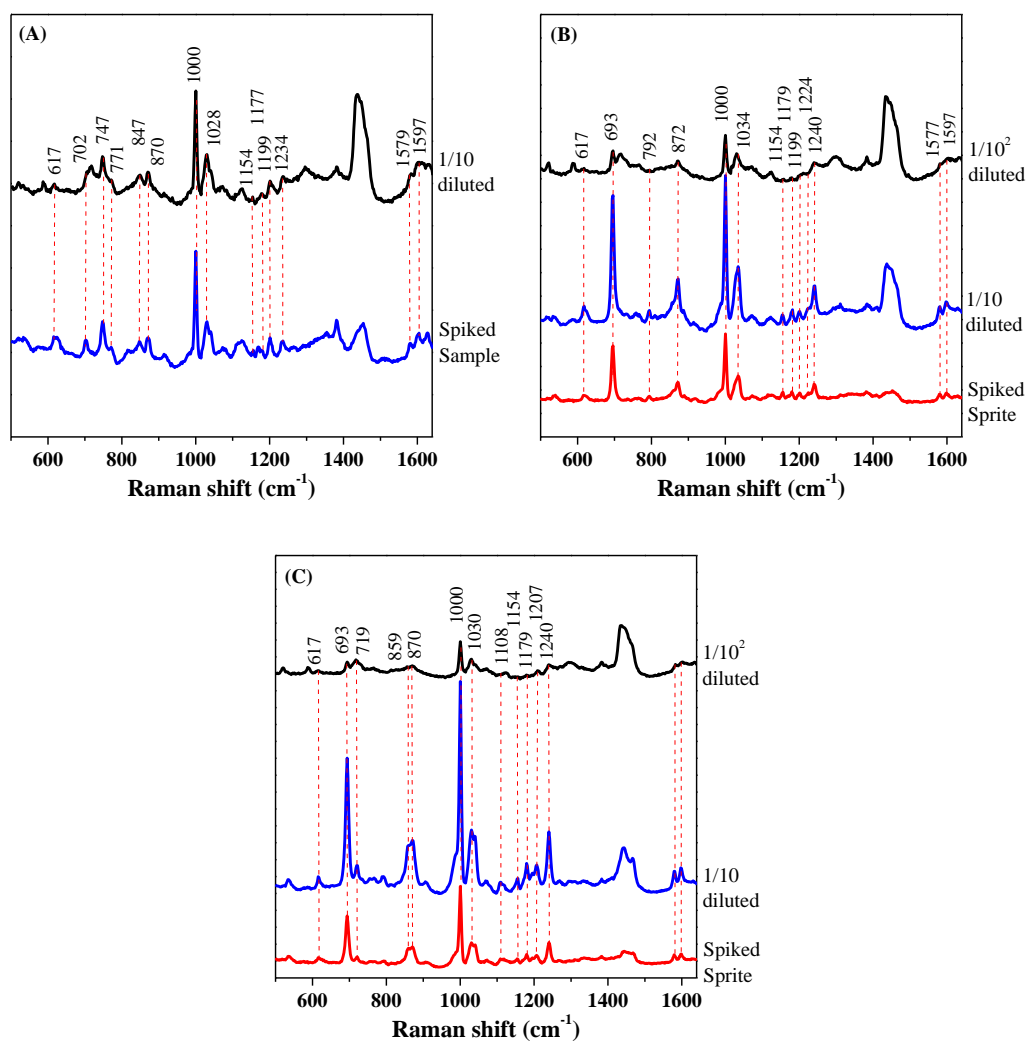

Figure S9. Sprite Spiked at  $1.0 \times 10^2 \mu\text{g/L}$  was diluted to different times by ultrapure water. (A) SH, (B) MB, and (C) SB.

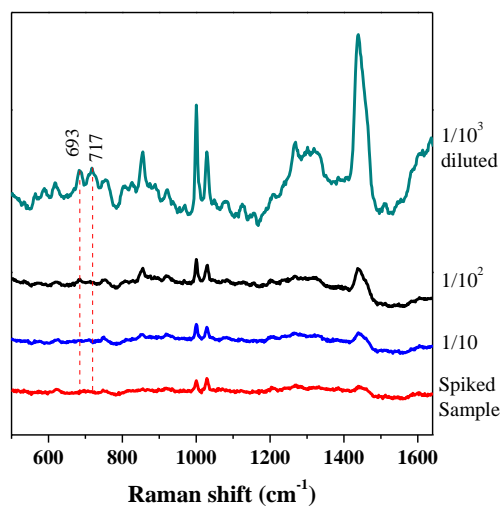

Figure S10. SERS spectra of SB in Minute Maid Spiked at  $1.0 \times 10^3 \mu\text{g/L}$ .

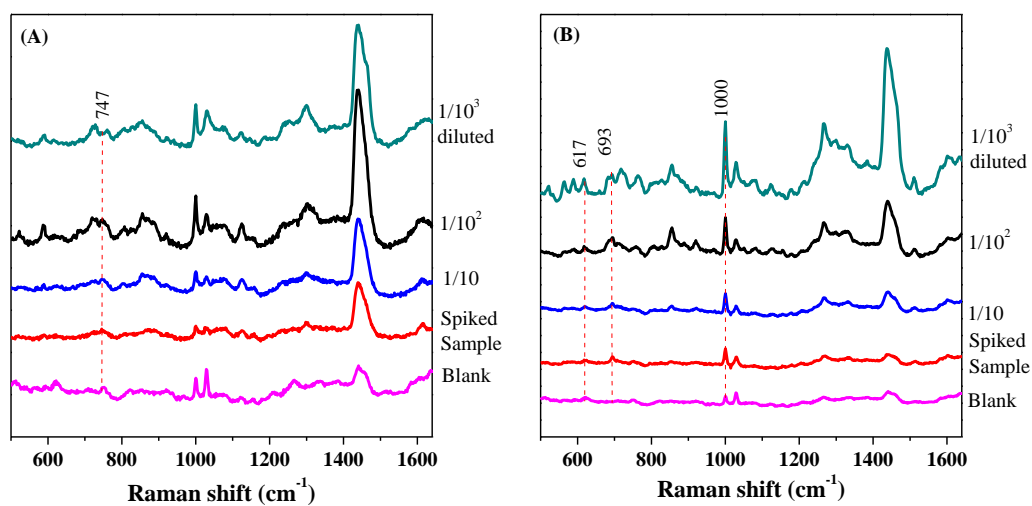

Figure S11. SERS spectra of TAs in Spiked Minute Maid. (A)  $1.0 \times 10^4$   $\mu\text{g/L}$  SH, and (B)  $1.0 \times 10^3$   $\mu\text{g/L}$  MB.

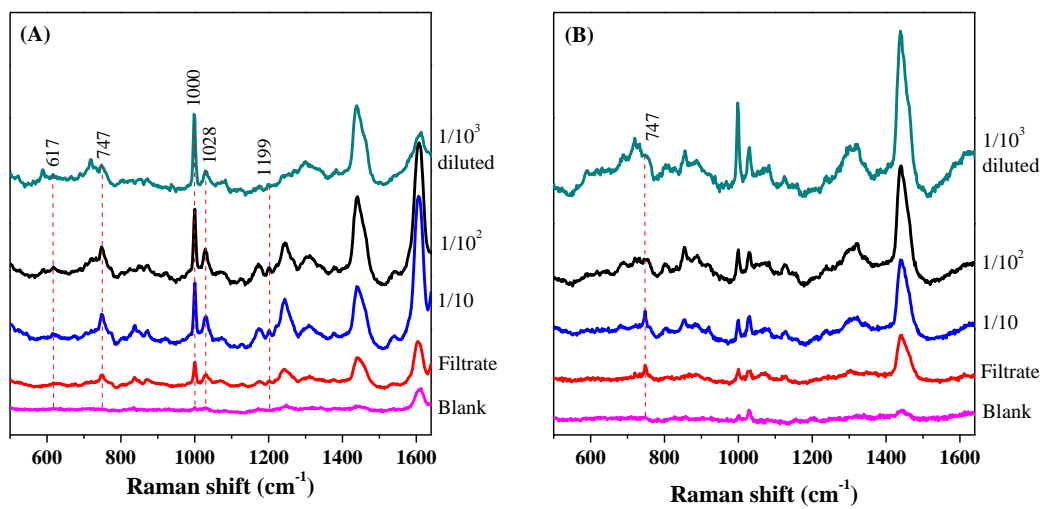

Figure S12. SERS spectra of  $2.0 \times 10^4$   $\mu\text{g/L}$  SH in spiked foods. (A) Cauliflower roast pork, and (B) Pumpkin Spiked.

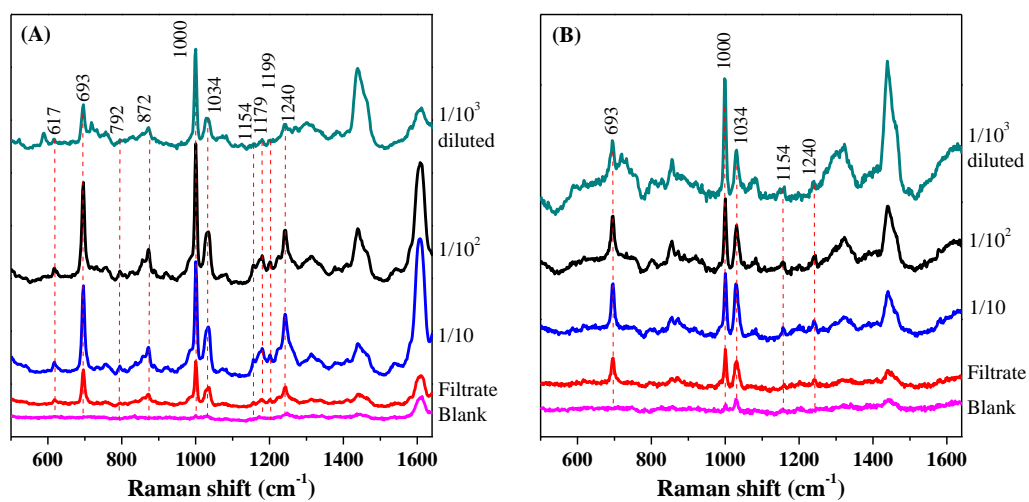

Figure S13. SERS spectra of  $2.0 \times 10^4$   $\mu\text{g/L}$  MB in spiked foods. (A) Cauliflower roast pork, and (B) Pumpkin Spiked.

Table S1 Experimental and calculated vibrational frequencies ( $\text{cm}^{-1}$ ) and assignment for TAs

| <i>mode</i><br><i>Species</i>  | $\omega_1 (\text{cm}^{-1})$ |                                             | $\omega_2 (\text{cm}^{-1})$                                                                              | $\omega_3 (\text{cm}^{-1})$                               |
|--------------------------------|-----------------------------|---------------------------------------------|----------------------------------------------------------------------------------------------------------|-----------------------------------------------------------|
| R-H (SH)                       | Expt                        | 1000                                        | 752                                                                                                      | 1203                                                      |
|                                | Theory                      | 998                                         | 780                                                                                                      | 1192                                                      |
|                                | Assignment                  | The trigonal deformation of the phenyl ring | The wagging vibration of $-\text{CH}_3$ around N atom                                                    | The deformation vibration of $-\text{CH}_3$ around N atom |
| R- $\text{CH}_3$ (MB)          | Expt                        | 998                                         | 700                                                                                                      | 1249                                                      |
|                                | Theory                      | 996                                         | 696                                                                                                      | 1230                                                      |
|                                | Assignment                  | The trigonal deformation of the phenyl ring | The wagging vibration of $-\text{CH}_3$ around N atom, the out-of-plane bending of CH in the phenyl ring | The deformation vibration of $-\text{CH}_3$ around N atom |
| R- $\text{C}_4\text{H}_9$ (SB) | Expt                        | 1000                                        | 698                                                                                                      | 1249                                                      |
|                                | Theory                      | 998                                         | 696                                                                                                      | 1217、1249                                                 |
|                                | Assignment                  | The trigonal deformation of the phenyl ring | The out-of-plane bending of CH in the phenyl ring                                                        | The wagging vibration of CH in the epoxy group            |

Table S2. Recovery of TAs in Spiked Samples.

| Spiked Samples                | Dilution          | SH                                                           |       |     | MB     |       |      | SB     |       |      |
|-------------------------------|-------------------|--------------------------------------------------------------|-------|-----|--------|-------|------|--------|-------|------|
|                               |                   | Calculated Concentration (µg/L) /Recovery (%) /RSD (%) (n=3) |       |     |        |       |      |        |       |      |
| Sprite                        | 1                 | 5.6                                                          | 0.56  | 1.4 | 2.4    | 0.24  | 4.3  | 2.4    | 0.24  | 3.1  |
| (spiked 1.0×10 <sup>3</sup>   | 1/10              | 114.1                                                        | 11.41 | 2.6 | 156.4  | 15.63 | 0.7  | 221.3  | 22.13 | 2.1  |
| µg/L)                         | 1/10 <sup>2</sup> | 466.6                                                        | 46.66 | 5.3 | 222.6  | 22.26 | 2.3  | 300.1  | 30.01 | 1.0  |
| Minute Maid                   | 1                 | 3.4                                                          | 0.03  | 8.6 | 0.4    | 0.04  | 2.6  | 0.4    | 0.04  | 3.7  |
| (spiked 1.0×10 <sup>3</sup>   | 1/10              | 34.8                                                         | 0.35  | 7.3 | 4.2    | 0.42  | 10.3 | 4.2    | 0.42  | 5.5  |
| µg/L, but 1.0×10 <sup>4</sup> | 1/10 <sup>2</sup> | 356.3                                                        | 3.56  | 4.3 | 44.6   | 4.46  | 4.8  | 52.7   | 5.27  | 6.8  |
| µg/L for SH)                  |                   |                                                              |       |     |        |       |      |        |       |      |
| Cauliflower roast             | 1                 | 3.7                                                          | 0.07  | 2.6 | 1.0    | 0.02  | 2.1  | 1.0    | 0.02  | 2.6  |
| pork                          | 1/10              | 42.1                                                         | 0.84  | 8.5 | 14.9   | 0.30  | 5.7  | 9.8    | 0.20  | 6.5  |
| (spiked 20.0 mg/kg)           | 1/10 <sup>2</sup> | 406.1                                                        | 8.12  | 4.6 | 160.3  | 3.21  | 10.3 | 101.2  | 2.02  | 5.8  |
|                               | 1/10 <sup>3</sup> | ND                                                           | ND    | ND  | 1072.5 | 21.45 | 6.8  | 1016.4 | 20.33 | 8.7  |
|                               | 1                 | 3.7                                                          | 0.07  | 6.3 | 0.9    | 0.02  | 3.6  | 1.0    | 0.02  | 3.6  |
| Pumpkin                       | 1/10              | 40.6                                                         | 0.81  | 8.7 | 9.3    | 0.19  | 8.9  | 9.9    | 0.20  | 5.8  |
| (spiked 20.0 mg/kg)           | 1/10 <sup>2</sup> | ND                                                           | ND    | ND  | 91.9   | 1.84  | 4.6  | 100.6  | 2.01  | 9.7  |
|                               | 1/10 <sup>3</sup> | ND                                                           | ND    | ND  | 911.7  | 18.23 | 7.3  | 1011.3 | 20.23 | 10.6 |

ND=Not detected.



Table S3. Recovery of TAs in Sprite spiked at  $1.0 \times 10^2 \mu\text{g/L}$ .

|        | Dilution          | SH                                                           |       |     | MB   |       |     | SB   |       |     |
|--------|-------------------|--------------------------------------------------------------|-------|-----|------|-------|-----|------|-------|-----|
|        |                   | Calculated Concentration (µg/L) /Recovery (%) /RSD (%) (n=3) |       |     |      |       |     |      |       |     |
| Sprite | 1                 | 4.1                                                          | 4.12  | 2.3 | 1.1  | 1.11  | 2.3 | 1.4  | 1.36  | 2.2 |
|        | 1/10              | 38.2                                                         | 38.24 | 5.4 | 17.3 | 17.33 | 3.3 | 36.7 | 36.72 | 6.8 |
|        | 1/10 <sup>2</sup> | ND                                                           | ND    | ND  | 87.9 | 87.95 | 1.8 | 83.6 | 83.62 | 4.6 |

ND=Not detected.
